# Supplementary material
Source: ML conference proceedings conference paper supplement (https://proceedings.neurips.cc/paper_files/paper/2015/hash/52d080a3e172c33fd6886a37e7288491-Abstract.html)
Supplement: Supplementary file 2 [file 52d080a3e172c33fd6886a37e7288491-Supplemental.zip]

Archive with 1 entries (1 files):
- PrivateGeoConvexNIPSFull.pdf
